# Supplementary material for: Modeling the NMR signatures associated with the functional conformational switch in the major light-harvesting antenna of photosystem II in higher plants
Source: Royal Society of Chemistry journal article supplement (doi:10.1039/c3cp54971b), 2014-01-01
Supplement: c3cp54971b1.pdf [file c3cp54971b1.pdf]

## **Modelling the NMR Signatures associated with the functional conformational switch in the major light-harvesting antenna of Photosystem II in Higher Plants**

Christopher D. P. Duffy<sup>1,#</sup>, Anjali Pandit<sup>2</sup>, Alexander V. Ruban<sup>1</sup>

<sup>1</sup>The School of Biological and Chemical Science, Queen Mary, University of London, Mile End, London E1 4NS

<sup>2</sup>Leiden Institute of Chemistry, Leiden University, P.O. Box 9502, 2300 RA Leiden, The Netherlands

#corresponding author, [c.duffy@qmul.ac.uk](mailto:c.duffy@qmul.ac.uk)

### **SUPPORTING INFORMATION**

#### *Effects of dihedral constraints on chlorophyll-a carbon chemical shifts*

The structures of Chla602, Chla603, Chla604, Chla610, and Chla612 were taken from the LHCII structure (PDB code 1RWT) reported by Liu et al 2004. The carbon atoms were replaced with the C13 isotope and the missing hydrogen atoms were added. Whilst freezing all dihedrals along the conjugated macrocycle each structure was optimised to the DFT/wB97xD/6-31G(d) level. The C13 chemical shifts (relative to a tetramethylsilane (TMS) chemical shift standard) were computed via a GIAO/wB97xD/6-311G(2d,2p) calculation. For comparison the same NMR calculations were performed on C13-enriched planar Chla. The constrained optimisation results in significant perturbations to the C13 chemical shifts relative to the values obtained for planar chlorophyll. The rms difference between the planar and distorted values is ~2.9 ppm with a maximum deviation of +13.8 ppm for C1 in Chla612. Such differences are typically larger than the qE-associated changes being investigated. Additionally, the precise physical meaning of these non-planar distortions is unclear given the resolution (2.72Å) of the LHCII structure. For this reason all no dihedral constraints were imposed on the chlorophylls during the calculations described in the main text.

## REFERENCES

Liu Z, Yan H, Wang K, Kuang T, Zhang J, Gui L, An X, Chang W (2004) Crystal structure of spinach major light-harvesting complex at 2.72 Å resolution. Nature 428: 287-292.

## TABLES

**TABLE S1:** The calculated C13 chemical shifts (ppm) of the conjugated macrocycle of a planar Chla compared with those calculated for constrained optimised Chla602, Chla603, Chla604, Chla610 and Chla612.

| Macrocycle | C13 Chemical Shift (ppm) |         |         |         |         |         |
|------------|--------------------------|---------|---------|---------|---------|---------|
|            | Chla                     | Chla602 | Chla603 | Chla604 | Chla610 | Chla612 |
| 1          | 157.817                  | 157.777 | 158.860 | 158.237 | 157.697 | 171.657 |
| 2          | 135.261                  | 136.122 | 137.691 | 136.054 | 138.394 | 137.357 |
| 3          | 144.344                  | 146.670 | 145.987 | 140.070 | 142.360 | 154.079 |
| 4          | 144.573                  | 145.400 | 144.727 | 148.693 | 146.643 | 137.743 |
| 5          | 107.517                  | 105.957 | 107.112 | 105.991 | 107.194 | 105.055 |
| 6          | 150.075                  | 148.975 | 151.332 | 150.838 | 150.149 | 153.499 |
| 7          | 135.095                  | 135.416 | 136.753 | 138.006 | 135.849 | 140.986 |
| 8          | 146.072                  | 148.105 | 147.385 | 147.604 | 147.184 | 148.405 |
| 9          | 143.629                  | 144.143 | 145.011 | 142.871 | 143.658 | 145.257 |
| 10         | 114.489                  | 115.025 | 113.398 | 114.506 | 113.924 | 107.140 |
| 11         | 146.327                  | 147.387 | 147.096 | 146.638 | 147.205 | 146.367 |
| 12         | 143.969                  | 144.366 | 142.221 | 147.548 | 144.887 | 147.349 |
| 13         | 133.310                  | 132.711 | 131.916 | 134.379 | 132.115 | 135.194 |
| 14         | 165.712                  | 163.006 | 165.123 | 167.971 | 166.350 | 161.655 |
| 15         | 103.375                  | 103.003 | 103.093 | 107.559 | 103.413 | 111.120 |
| 16         | 163.270                  | 161.146 | 163.159 | 162.625 | 161.066 | 167.750 |
| 17         | 47.069                   | 51.807  | 49.439  | 50.312  | 48.206  | 45.861  |
| 18         | 49.754                   | 46.218  | 44.586  | 51.245  | 49.360  | 48.344  |
| 19         | 171.859                  | 173.811 | 173.319 | 174.760 | 175.839 | 175.043 |
| 20         | 89.404                   | 88.443  | 87.998  | 88.790  | 90.803  | 88.099  |
